# Supplementary material for: Photoluminescence responses of graphene quantum dots toward organic bases and an acid
Source: Royal Society of Chemistry journal article supplement (doi:10.1039/c7pp00067g), 2017-04-19
Supplement: c7pp00067g1.pdf [file c7pp00067g1.pdf]

**- Electronic Supplementary Information -**

**Photoluminescent responses of graphene quantum  
dots toward organic bases and an acid**

Kaho Suzuki, Kairi Yamato, Ryo Sekiya, and Takeharu Haino\*

Department of Chemistry, Graduate School of Science, Hiroshima University, 1-3-1 Kagamiyama,  
Higashi-Hiroshima, Hiroshima 739-8526 Japan

\*To whom correspondence should be addressed.

[haino@hiroshima-u.ac.jp](mailto:haino@hiroshima-u.ac.jp)

# Contents

## Experimental Section

|                        |        |
|------------------------|--------|
| • General              | ... S3 |
| • DLS analysis         | ... S3 |
| • Computational Detail | ... S3 |

## Supporting Figures and Tables

|                                                                                                                     |        |
|---------------------------------------------------------------------------------------------------------------------|--------|
| • <b>Figure S1.</b> UV/vis absorption and photoluminescence spectra of GQD-1                                        | ... S4 |
| • <b>Figure S2.</b> UV/vis absorption and photoluminescence titration experiments (amine: <b>3</b> )                | ... S4 |
| • <b>Figure S3.</b> UV/vis absorption and photoluminescence titration experiments (amine: <b>4</b> )                | ... S4 |
| • <b>Figure S4.</b> UV/vis absorption and photoluminescence titration experiments (amine: <b>6</b> )                | ... S5 |
| • <b>Figure S5.</b> UV/vis absorption and photoluminescence titration experiments (NaOH)                            | ... S5 |
| • <b>Figure S6.</b> <sup>1</sup> H NMR titration experiment (amine: <b>6</b> ) in chloroform- <i>d</i> <sub>1</sub> | ... S5 |
| • <b>Figure S7.</b> DQF-COSY spectrum of <b>2</b> in chloroform- <i>d</i> <sub>1</sub>                              | ... S6 |
| • <b>Figure S8.</b> DQF-COSY spectrum of <b>3</b> in chloroform- <i>d</i> <sub>1</sub>                              | ... S6 |
| • <b>Table S1.</b> The energy levels of the HOMO and LUMO of <b>2–6</b>                                             | ... S7 |

## Cartesian Coordinates

|                                     |         |
|-------------------------------------|---------|
| • Cartesian Coordinates of <b>2</b> | ... S8  |
| • Cartesian Coordinates of <b>3</b> | ... S9  |
| • Cartesian Coordinates of <b>4</b> | ... S10 |
| • Cartesian Coordinates of <b>5</b> | ... S11 |
| • Cartesian Coordinates of <b>6</b> | ... S11 |

## References

|              |         |
|--------------|---------|
| • References | ... S12 |
|--------------|---------|

# Experimental Section

## General

All chemicals and solvents were purchased from Kanto Chemical Co., Ltd., Wako Pure Chemical Co., Ltd., Tokyo Kasei Kogyo Co., Ltd., and Sigma-Aldrich Co., Ltd., and were used as received without further purification.  $^1\text{H}$ , and  $^{13}\text{C}$ NMR spectra were recorded on a VARIAN 300 MHz spectrometer. Chemical shifts are quoted as parts per million (ppm) relative to chloroform ( $\text{CDCl}_3$ ,  $\delta = 7.26$  ppm for  $^1\text{H}$  and 77.16 ppm for  $^{13}\text{C}$ ). IR absorption spectra were recorded on a JASCO FT/IR-4600 spectrometer using pellets in KBr. UV/vis absorption spectra were recorded on a JASCO V-560 spectrophotometer. Emission spectra were recorded on a JASCO FP-6500 spectrophotometer. GQD-1 were synthesized by the method reported previously.<sup>[1]</sup>

## Computational Details

Geometry optimizations for **2–6** were performed by *Gaussian 09* using B3LYP/6-31G level of theory.<sup>[2]</sup> The energy levels of the HOMO and LUMO of **2–6** are listed in Table S1. The Cartesian coordinates of the energy-minimized conformations of **2–6** are listed in Tables S2-S6.

## Supporting Figures and Tables

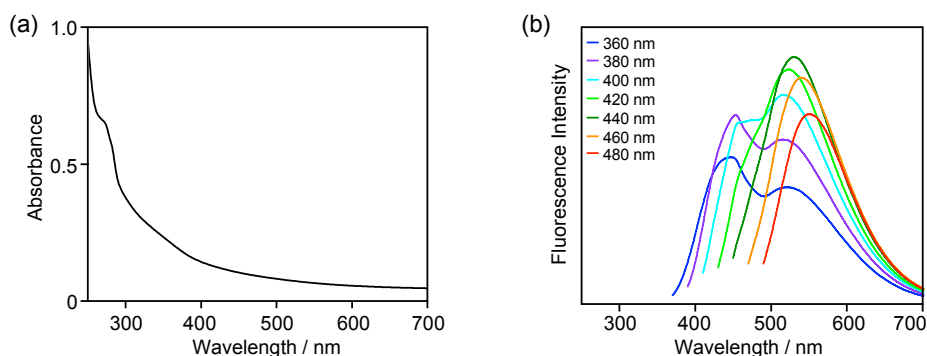

**Figure S1.** (a) UV/vis absorption and (b) photoluminescence ( $\lambda_{\text{ex}} = 360, 380, 400, 420, 440, 460,$  and  $480$  nm) spectra of GQD-1 in 1,2-dichloroethane at 293 K.

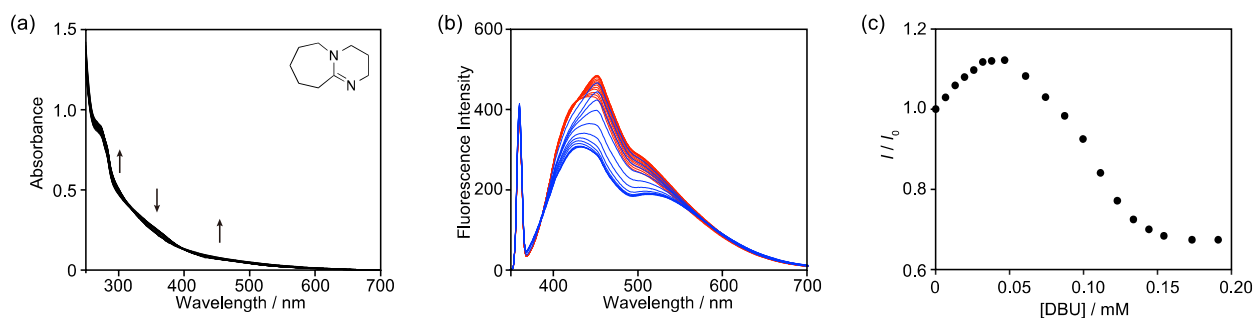

**Figure S2.** (a) UV/vis absorption and (b) photoluminescence ( $\lambda_{\text{ex}} = 360$  nm) titration experiments of GQD-1 in 1,2-dichloroethane at 293 K. Amine: 1,8-diazabicyclo[5.4.0]undec-7-ene (**3**). (c) Stern-Volmer plot of GQD-1 ( $\lambda = 450$  nm) upon addition of **3**.

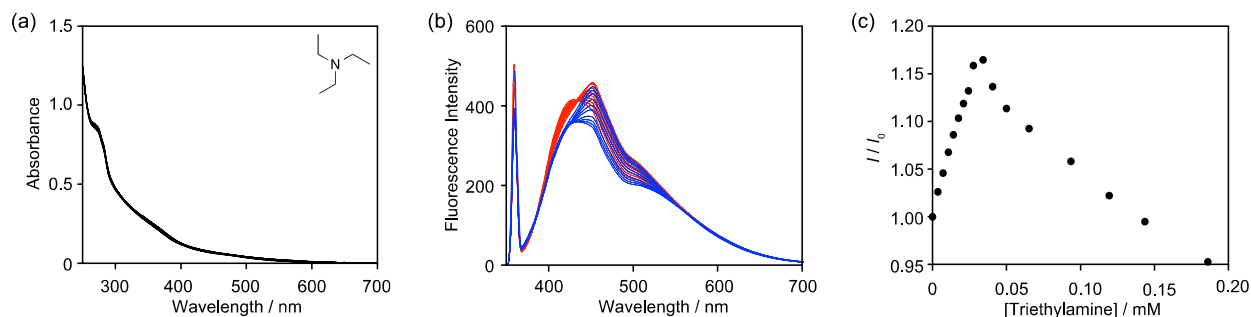

**Figure S3.** (a) UV/vis absorption and (b) photoluminescence ( $\lambda_{\text{ex}} = 360$  nm) titration experiments of GQD-1 in 1,2-dichloroethane at 293 K. Amine: triethylamine (**4**). (c) Stern-Volmer plot of GQD-1 ( $\lambda = 450$  nm) upon addition of **4**.

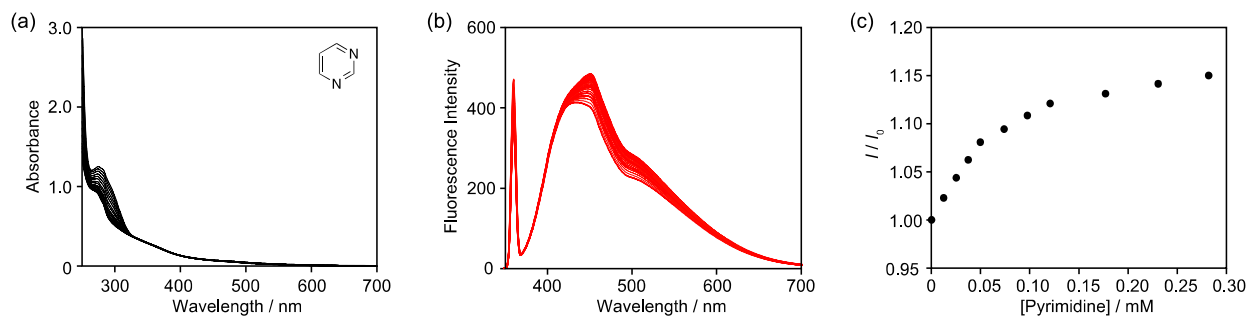

**Figure S4.** (a) UV/vis absorption and (b) photoluminescence ( $\lambda_{\text{ex}} = 360$  nm) titration experiments of GQD-1 in 1,2-dichloroethane at 293 K. Amine: pyrimidine (**6**). (c) Stern-Volmer plot of GQD-1 ( $\lambda = 450$  nm) upon addition of **6**.

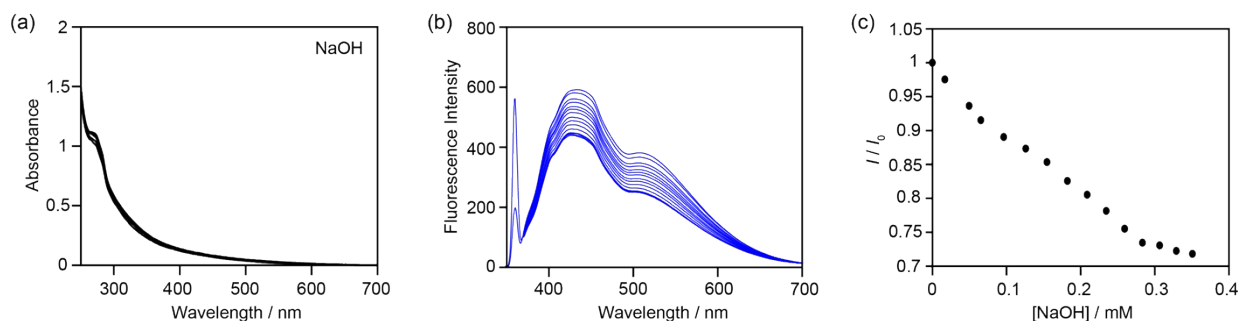

**Figure S5.** (a) UV/vis absorption and (b) photoluminescence ( $\lambda_{\text{ex}} = 360$  nm) titration experiments of GQD-1 in a mixed solvent of THF and ethanol at 293 K. Base: sodium hydroxide. (c) Stern-Volmer plot of GQD-1 ( $\lambda = 450$  nm) upon addition of base.

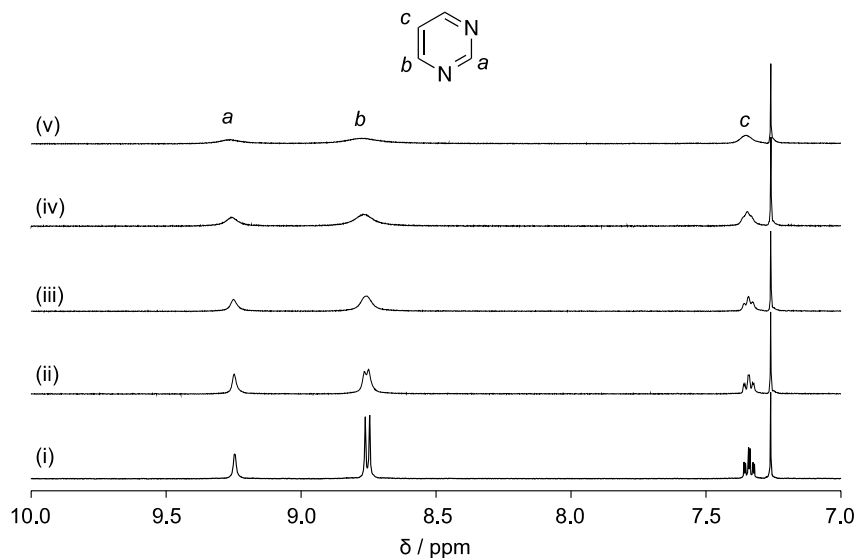

**Figure S6.**  $^1\text{H}$  NMR (300 MHz, 293 K, chloroform- $d_1$ ) titration experiment of GQD-1. Amine: pyrimidine (**6**). The concentration of **6** was 31.84 mM throughout the experiment. The concentration of GQD-1 were (i) 0, (ii) 0.46, (iii) 0.93, (iv) 1.87, and (v) 3.74  $\text{mg mL}^{-1}$ .

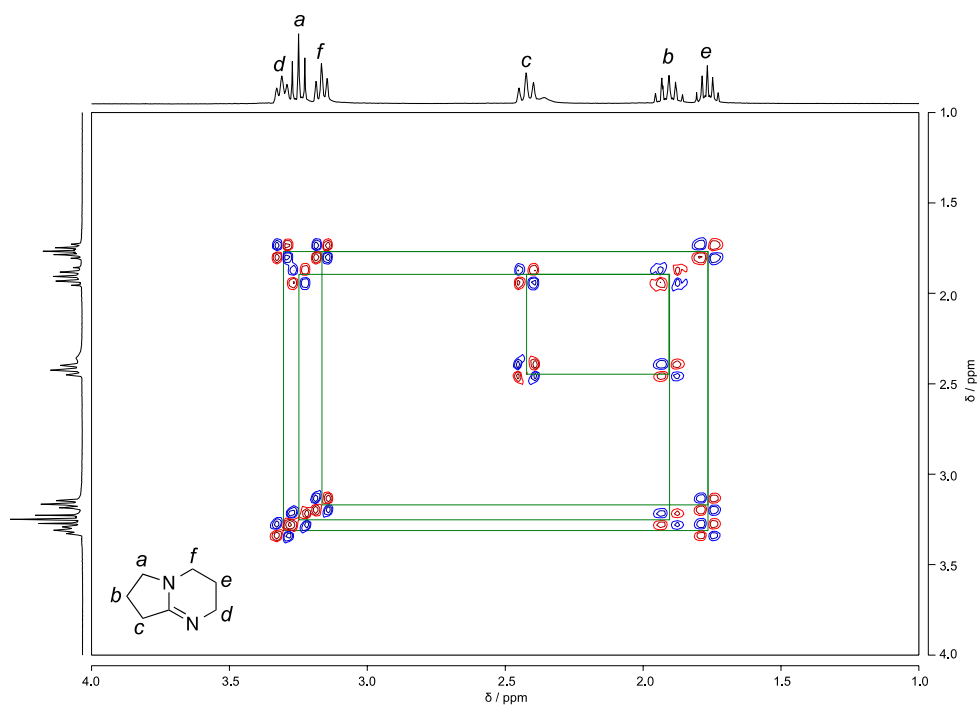

**Figure S7.** DQF-COSY (300 MHz, 293 K, chloroform-*d*<sub>1</sub>) of 1,5-diazabicyclo[4.3.0]non-5-ene (**2**).

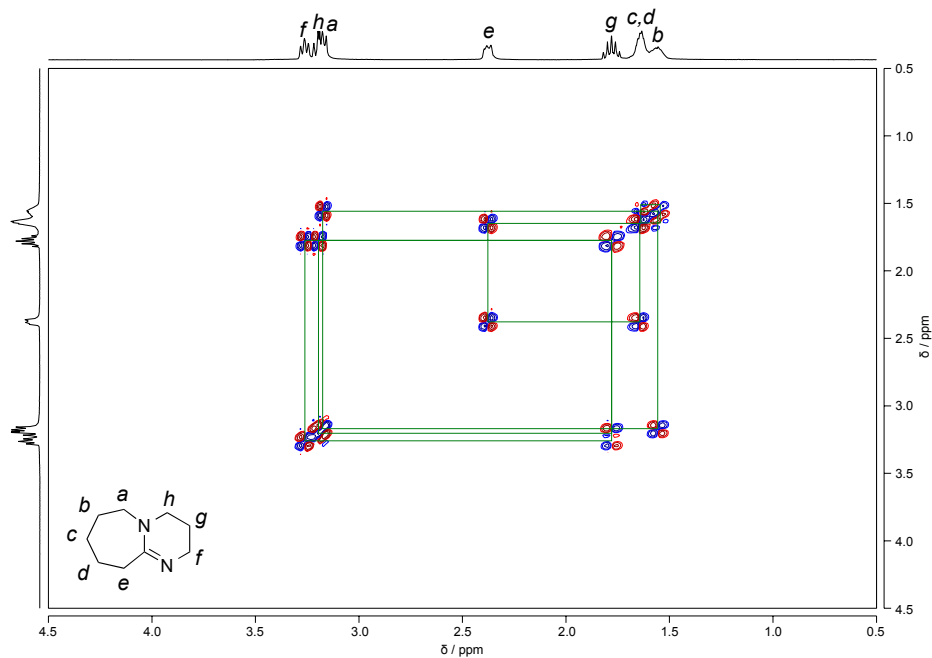

**Figure S8.** DQF-COSY (300 MHz, 293 K, chloroform-*d*<sub>1</sub>) of 1,8-diazabicyclo[5.4.0]undec-7-ene (**3**).

**Table S1.** The energy levels of the HOMO+1, HOMO, LUMO, and LUMO+1 of **2–6** calculated by *Gaussian 09* using B3LYP/6-31G(d,p) level of theory.

| Base     | HOMO+1 / hartree | HOMO / hartree | LUMO / hartree | LUMO+1 / hartree |
|----------|------------------|----------------|----------------|------------------|
| <b>2</b> | -0.22446         | -0.19968       | +0.04325       | +0.08584         |
| <b>3</b> | -0.22085         | -0.19642       | +0.04519       | +0.06936         |
| <b>4</b> | -0.32065         | -0.20417       | +0.09184       | +0.10894         |
| <b>5</b> | -0.26185         | -0.25251       | -0.02312       | -0.01034         |
| <b>6</b> | -0.28997         | -0.25465       | -0.04299       | -0.03085         |
|          | HOMO+1 / eV      | HOMO / eV      | LUMO / eV      | LUMO+1 / eV      |
| <b>2</b> | -6.1078          | -5.4335        | +1.1769        | +2.3358          |
| <b>3</b> | -6.0095          | -5.3448        | +1.2297        | +1.8874          |
| <b>4</b> | -8.7272          | -5.5557        | +2.4991        | +2.9644          |
| <b>5</b> | -7.1252          | -6.8710        | -0.6291        | -0.2814          |
| <b>6</b> | -7.8904          | -6.9293        | -1.1698        | -0.8395          |

1 hartree = 27.211 eV

## Cartesian Coordinates

**Table S2.** Cartesian coordinates of the optimized structure of **2** at the B3LYP/6-31G(d,p) level.

| Center<br>Number | Atomic<br>Number | Atomic<br>Type | Coordinates (Angstroms) |           |           |
|------------------|------------------|----------------|-------------------------|-----------|-----------|
|                  |                  |                | X                       | Y         | Z         |
| 1                | 6                | 0              | 1.569684                | 1.181220  | -0.185106 |
| 2                | 6                | 0              | 2.466481                | 0.017521  | 0.281678  |
| 3                | 6                | 0              | 1.631262                | -1.234551 | -0.048824 |
| 4                | 1                | 0              | 1.717559                | 2.096642  | 0.400465  |
| 5                | 1                | 0              | 1.754772                | 1.433012  | -1.243911 |
| 6                | 1                | 0              | 3.445932                | 0.027126  | -0.202544 |
| 7                | 1                | 0              | 2.624038                | 0.091484  | 1.362366  |
| 8                | 1                | 0              | 1.776956                | -2.066039 | 0.643780  |
| 9                | 1                | 0              | 1.852512                | -1.608035 | -1.056050 |
| 10               | 6                | 0              | -2.137407               | -0.830842 | -0.128515 |
| 11               | 6                | 0              | -2.151260               | 0.617143  | 0.390968  |
| 12               | 6                | 0              | -0.979572               | 1.412396  | -0.197876 |
| 13               | 1                | 0              | -2.857008               | -1.429573 | 0.442885  |
| 14               | 1                | 0              | -2.490102               | -0.855156 | -1.170943 |
| 15               | 1                | 0              | -2.055792               | 0.613129  | 1.482959  |
| 16               | 1                | 0              | -3.099539               | 1.108096  | 0.146885  |
| 17               | 1                | 0              | -0.880798               | 2.388299  | 0.293786  |
| 18               | 1                | 0              | -1.143677               | 1.606501  | -1.271522 |
| 19               | 6                | 0              | 0.195403                | -0.738670 | -0.025297 |
| 20               | 7                | 0              | 0.232516                | 0.647547  | 0.015242  |
| 21               | 7                | 0              | -0.834288               | -1.497659 | -0.065289 |



**Table S3.** Cartesian coordinates of the optimized structure of **3** at the B3LYP/6-31G(d,p) level.

| Center<br>Number | Atomic<br>Number | Atomic<br>Type | Coordinates (Angstroms) |           |           |
|------------------|------------------|----------------|-------------------------|-----------|-----------|
|                  |                  |                | X                       | Y         | Z         |
| 1                | 6                | 0              | 2.597149                | -0.768363 | 0.205507  |
| 2                | 6                | 0              | 2.372454                | 0.645508  | 0.751839  |
| 3                | 6                | 0              | 1.445136                | 1.410606  | -0.190834 |
| 4                | 1                | 0              | 3.190301                | -1.358311 | 0.914302  |
| 5                | 1                | 0              | 3.192533                | -0.716371 | -0.719964 |
| 6                | 1                | 0              | 3.317311                | 1.187828  | 0.866653  |
| 7                | 1                | 0              | 1.909875                | 0.577503  | 1.743879  |
| 8                | 1                | 0              | 1.991041                | 1.707496  | -1.099981 |
| 9                | 1                | 0              | 1.095356                | 2.334524  | 0.285903  |
| 10               | 6                | 0              | -0.954865               | 1.279000  | -0.904078 |
| 11               | 6                | 0              | -1.987395               | 1.355563  | 0.243144  |
| 12               | 6                | 0              | -2.036377               | 0.078357  | 1.095710  |
| 13               | 6                | 0              | -2.133165               | -1.242760 | 0.314053  |
| 14               | 6                | 0              | -0.970595               | -1.524010 | -0.685107 |
| 15               | 1                | 0              | -0.691459               | 2.286213  | -1.242645 |
| 16               | 1                | 0              | -1.404643               | 0.783745  | -1.770343 |
| 17               | 1                | 0              | -1.753906               | 2.204079  | 0.898480  |
| 18               | 1                | 0              | -2.971937               | 1.565241  | -0.195488 |
| 19               | 1                | 0              | -1.138388               | 0.042189  | 1.723521  |
| 20               | 1                | 0              | -2.884604               | 0.145070  | 1.787568  |
| 21               | 1                | 0              | -3.087177               | -1.285592 | -0.226322 |
| 22               | 1                | 0              | -2.162870               | -2.055599 | 1.047834  |
| 23               | 1                | 0              | -1.292922               | -1.290500 | -1.706801 |
| 24               | 1                | 0              | -0.714870               | -2.584181 | -0.672416 |
| 25               | 7                | 0              | 0.283078                | 0.594132  | -0.545363 |
| 26               | 6                | 0              | 0.325256                | -0.786474 | -0.398075 |
| 27               | 7                | 0              | 1.354175                | -1.483832 | -0.058513 |

**Table S4.** Cartesian coordinates of the optimized structure of **4** at the B3LYP/6-31G(d,p) level.

---

| Center<br>Number | Atomic<br>Number | Atomic<br>Type | Coordinates (Angstroms) |           |           |
|------------------|------------------|----------------|-------------------------|-----------|-----------|
|                  |                  |                | X                       | Y         | Z         |
| 1                | 6                | 0              | -1.928636               | 1.524753  | -0.437753 |
| 2                | 1                | 0              | -2.682909               | 0.732182  | -0.407871 |
| 3                | 1                | 0              | -2.411997               | 2.449403  | -0.104492 |
| 4                | 1                | 0              | -1.615405               | 1.649359  | -1.478300 |
| 5                | 7                | 0              | 0.000386                | 0.000789  | 0.019178  |
| 6                | 6                | 0              | -0.359628               | -2.431266 | -0.437579 |
| 7                | 6                | 0              | -0.684318               | -1.225974 | 0.446370  |
| 8                | 1                | 0              | -1.762407               | -1.045772 | 0.395705  |
| 9                | 1                | 0              | -0.464477               | -1.461749 | 1.506140  |
| 10               | 6                | 0              | -0.720303               | 1.207405  | 0.444637  |
| 11               | 1                | 0              | -0.026345               | 2.051689  | 0.390897  |
| 12               | 1                | 0              | -1.032634               | 1.137021  | 1.505111  |
| 13               | 6                | 0              | 1.405104                | 0.021527  | 0.446450  |
| 14               | 1                | 0              | 1.787512                | -1.002486 | 0.397501  |
| 15               | 1                | 0              | 1.499269                | 0.331248  | 1.505816  |
| 16               | 6                | 0              | 2.287595                | 0.903367  | -0.438446 |
| 17               | 1                | 0              | 3.329389                | 0.858894  | -0.103187 |
| 18               | 1                | 0              | 1.981007                | 1.953775  | -0.414234 |
| 19               | 1                | 0              | 2.240218                | 0.565026  | -1.477521 |
| 20               | 1                | 0              | -0.918696               | -3.311642 | -0.102794 |
| 21               | 1                | 0              | 0.703644                | -2.689910 | -0.412060 |
| 22               | 1                | 0              | -0.627752               | -2.221432 | -1.477029 |

---

**Table S5.** Cartesian coordinates of the optimized structure of **5** at the B3LYP/6-31G(d,p) level.

---

| Center<br>Number | Atomic<br>Number | Atomic<br>Type | Coordinates (Angstroms) |           |           |
|------------------|------------------|----------------|-------------------------|-----------|-----------|
|                  |                  |                | X                       | Y         | Z         |
| 1                | 6                | 0              | 1.197699                | 0.674071  | 0.000001  |
| 2                | 6                | 0              | 1.143063                | -0.720627 | 0.000000  |
| 3                | 6                | 0              | -1.141366               | -0.723246 | 0.000001  |
| 4                | 6                | 0              | -1.199052               | 0.671840  | 0.000001  |
| 5                | 6                | 0              | -0.001591               | 1.385366  | 0.000000  |
| 6                | 1                | 0              | 2.155685                | 1.184559  | -0.000001 |
| 7                | 1                | 0              | 2.061707                | -1.304941 | 0.000001  |
| 8                | 1                | 0              | -2.059013               | -1.309161 | 0.000001  |
| 9                | 1                | 0              | -2.158359               | 1.179842  | -0.000002 |
| 10               | 1                | 0              | -0.002449               | 2.471638  | -0.000005 |
| 11               | 7                | 0              | 0.001416                | -1.420909 | -0.000001 |

---

**Table S6.** Cartesian coordinates of the optimized structure of **6** at the B3LYP/6-31G(d,p) level.

---

| Center<br>Number | Atomic<br>Number | Atomic<br>Type | Coordinates (Angstroms) |           |           |
|------------------|------------------|----------------|-------------------------|-----------|-----------|
|                  |                  |                | X                       | Y         | Z         |
| 1                | 6                | 0              | -1.309629               | 0.003347  | -0.000036 |
| 2                | 6                | 0              | 0.619154                | -1.186117 | 0.000006  |
| 3                | 6                | 0              | 1.356270                | -0.003120 | 0.000001  |
| 4                | 6                | 0              | 0.625619                | 1.182843  | 0.000003  |
| 5                | 1                | 0              | -2.397929               | 0.005936  | 0.000085  |
| 6                | 1                | 0              | 1.113687                | -2.156099 | -0.000004 |
| 7                | 1                | 0              | 2.440825                | -0.006311 | -0.000024 |
| 8                | 1                | 0              | 1.124174                | 2.150744  | 0.000008  |
| 9                | 7                | 0              | -0.719246               | -1.197288 | 0.000007  |
| 10               | 7                | 0              | -0.713503               | 1.200717  | 0.000006  |

---

## References

- [1] R. Sekiya, Y. Uemura, H. Naito, K. Naka, and T. Haino, *Chem. Eur. J.* **2016**, *22*, 8198–8206.
- [2] *Gaussian 09*, Revision C.01, Frisch, M. J.; Trucks, G. W.; Schlegel, H. B.; Scuseria, G. E.; Robb, M. A.; Cheeseman, J. R.; Scalmani, G.; Barone, V.; Mennucci, B.; Petersson, G. A.; Nakatsuji, H.; Caricato, M.; Li, X.; Hratchian, H. P.; Izmaylov, A. F.; Bloino, J.; Zheng, G.; Sonnenberg, J. L.; Hada, M.; Ehara, M.; Toyota, K.; Fukuda, R.; Hasegawa, J.; Ishida, M.; Nakajima, T.; Honda, Y.; Kitao, O.; Nakai, H.; Vreven, T.; Montgomery, Jr., J. A.; Peralta, J. E.; Ogliaro, F.; Bearpark, M.; Heyd, J. J.; Brothers, E.; Kudin, K. N.; Staroverov, V. N.; Kobayashi, R.; Normand, J.; Raghavachari, K.; Rendell, A.; Burant, J. C.; Iyengar, S. S.; Tomasi, J.; Cossi, M.; Rega, N.; Millam, J. M.; Klene, M.; Knox, J. E.; Cross, J. B.; Bakken, V.; Adamo, C.; Jaramillo, J.; Gomperts, R.; Stratmann, R. E.; Yazyev, O.; Austin, A. J.; Cammi, R.; Pomelli, C.; Ochterski, J. W.; Martin, R. L.; Morokuma, K.; Zakrzewski, V. G.; Voth, G. A.; Salvador, P.; Dannenberg, J. J.; Dapprich, S.; Daniels, A. D.; Farkas, Ö.; Foresman, J. B.; Ortiz, J. V.; Cioslowski, J.; Fox, D. J. Gaussian, Inc., Wallingford CT, 2009.
